# Supplementary material
Source: PubMed Central journal article supplement (PMC3761364)
Supplement: NIHMS433138-supplement-1.pdf [file NIHMS433138-supplement-1.pdf]

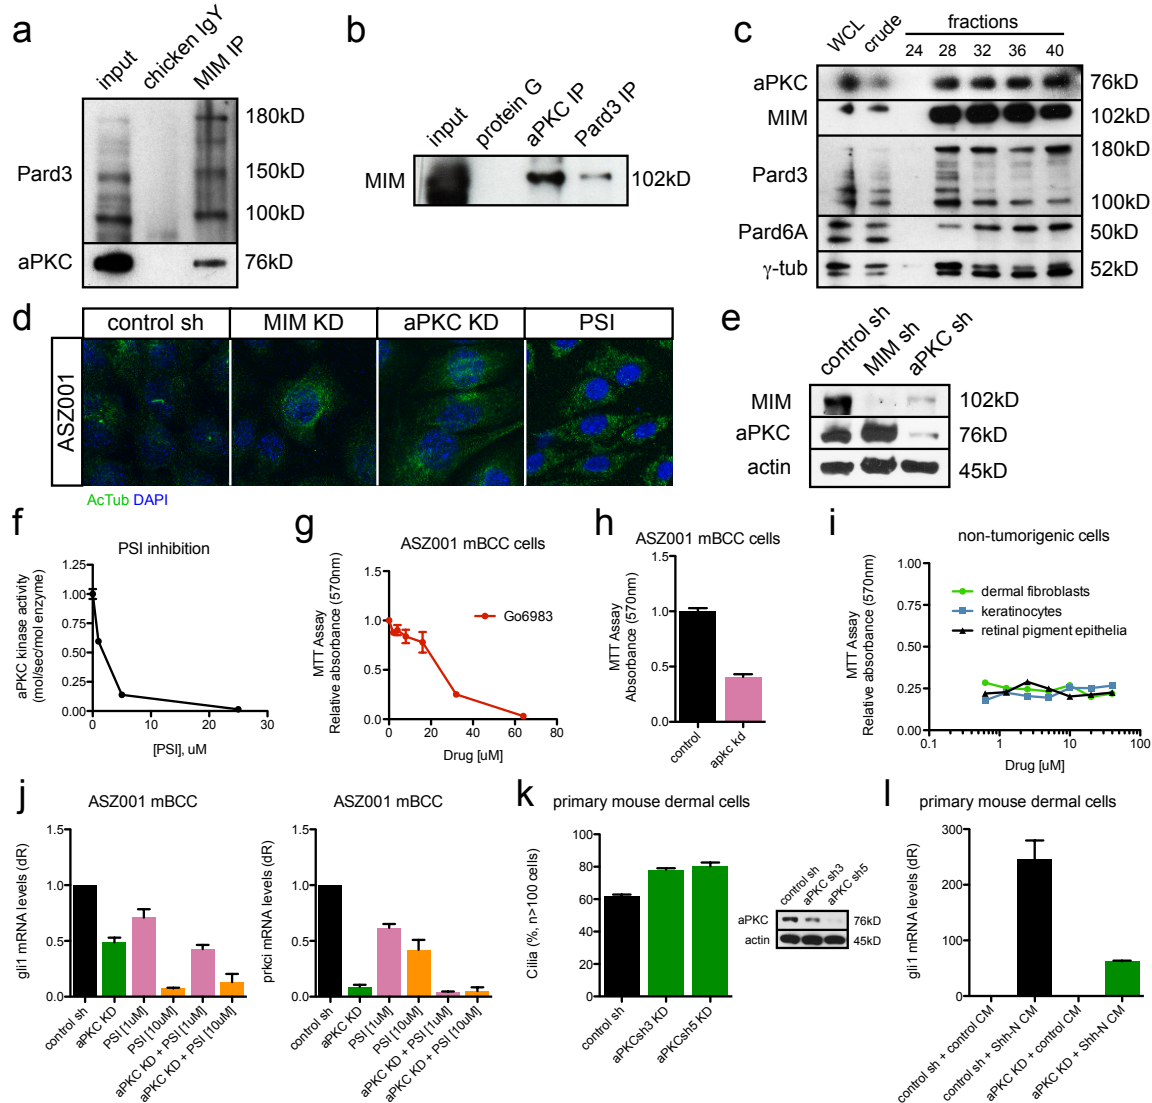

**Supplementary Figure 1: aPKC alters BCC cell growth.** **a, b**, Reciprocal immunoprecipitation of MIM-aPKC-Pard3 complexes from mouse dermal cells. **c**, Cofractionation of purified centrosome fractions from mouse fibroblasts. WCL, whole cell lysate. Crude, unpurified centrosome lysate.  $\gamma$ -tub,  $\gamma$ -tubulin. **d**, Cilia (Actub) after shRNA knockdown of MIM, aPKC, or inhibition of aPKC in BCC cells (n=3). sh, short-hairpin. KD, knockdown. **e** aPKC or MIM protein levels compared to actin. **f**, PSI suppresses *in vitro* aPKC activity (n=3). **g**, Pan PKC inhibitor Go6983 suppresses BCC cell growth (n=3). **h**, aPKC knockdown reduces BCC cell growth (n=3). **i**, PSI does not alter cell proliferation of mouse dermal fibroblasts, mouse keratinocytes, and human retinal pigment epithelial cells (n=3). **j**, aPKC inhibition and shRNA knockdown do not amplify loss of Hh signaling (n=3). **k, l**, Hh signaling and ciliogenesis are separable in mouse dermal cells after aPKC shRNA (n=3). Error bars, s.e.m.

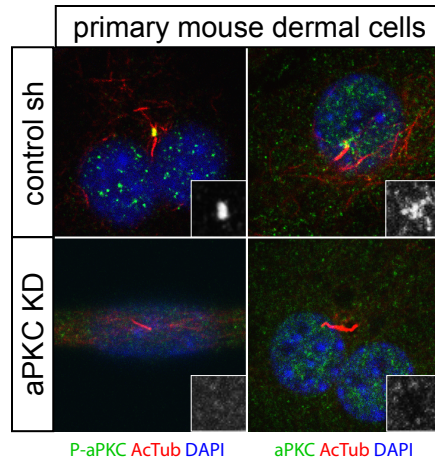

**Supplementary Figure 2: aPKC localizes to the basal body.** aPKC or P-aPKC found at the basal body of primary mouse dermal cells and immunoreactivity is reduced upon aPKC knockdown. Actub, acetylated tubulin.

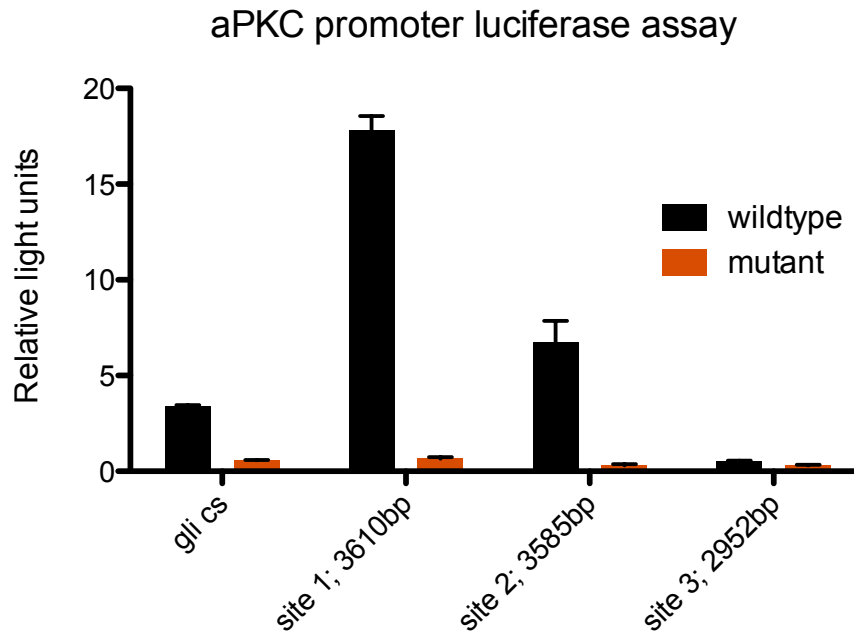

**Supplementary Figure 3: Functional Gli binding sites are found in the aPKC promoter.** Luciferase assay of multimerized Gli binding sites or their mutants show two functional Gli binding sites within the aPKC promoter (n=4). Gli cs, consensus sequence. Error bars, s.e.m.

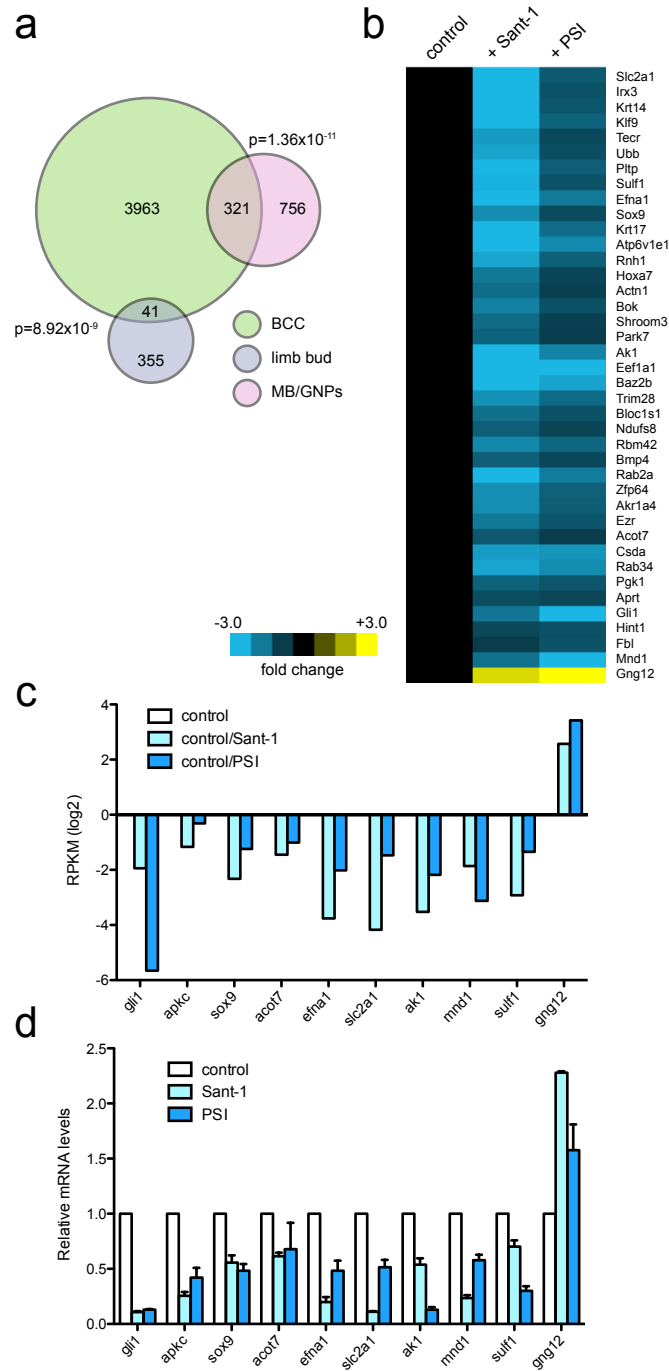

**Supplementary Figure 4: aPKC inhibition affects Hh target genes.** **a**, Venn diagram and **(b)** heatmap of commonly altered transcripts in both Sant-1 and PSI-treated samples compared to ChIP-Seq data sets from limb bud and medulloblastoma/GNPs. **c**, RPKM values and **(d)** subsequent validated transcript levels of commonly altered transcripts (n=3). Error bars, s.e.m.

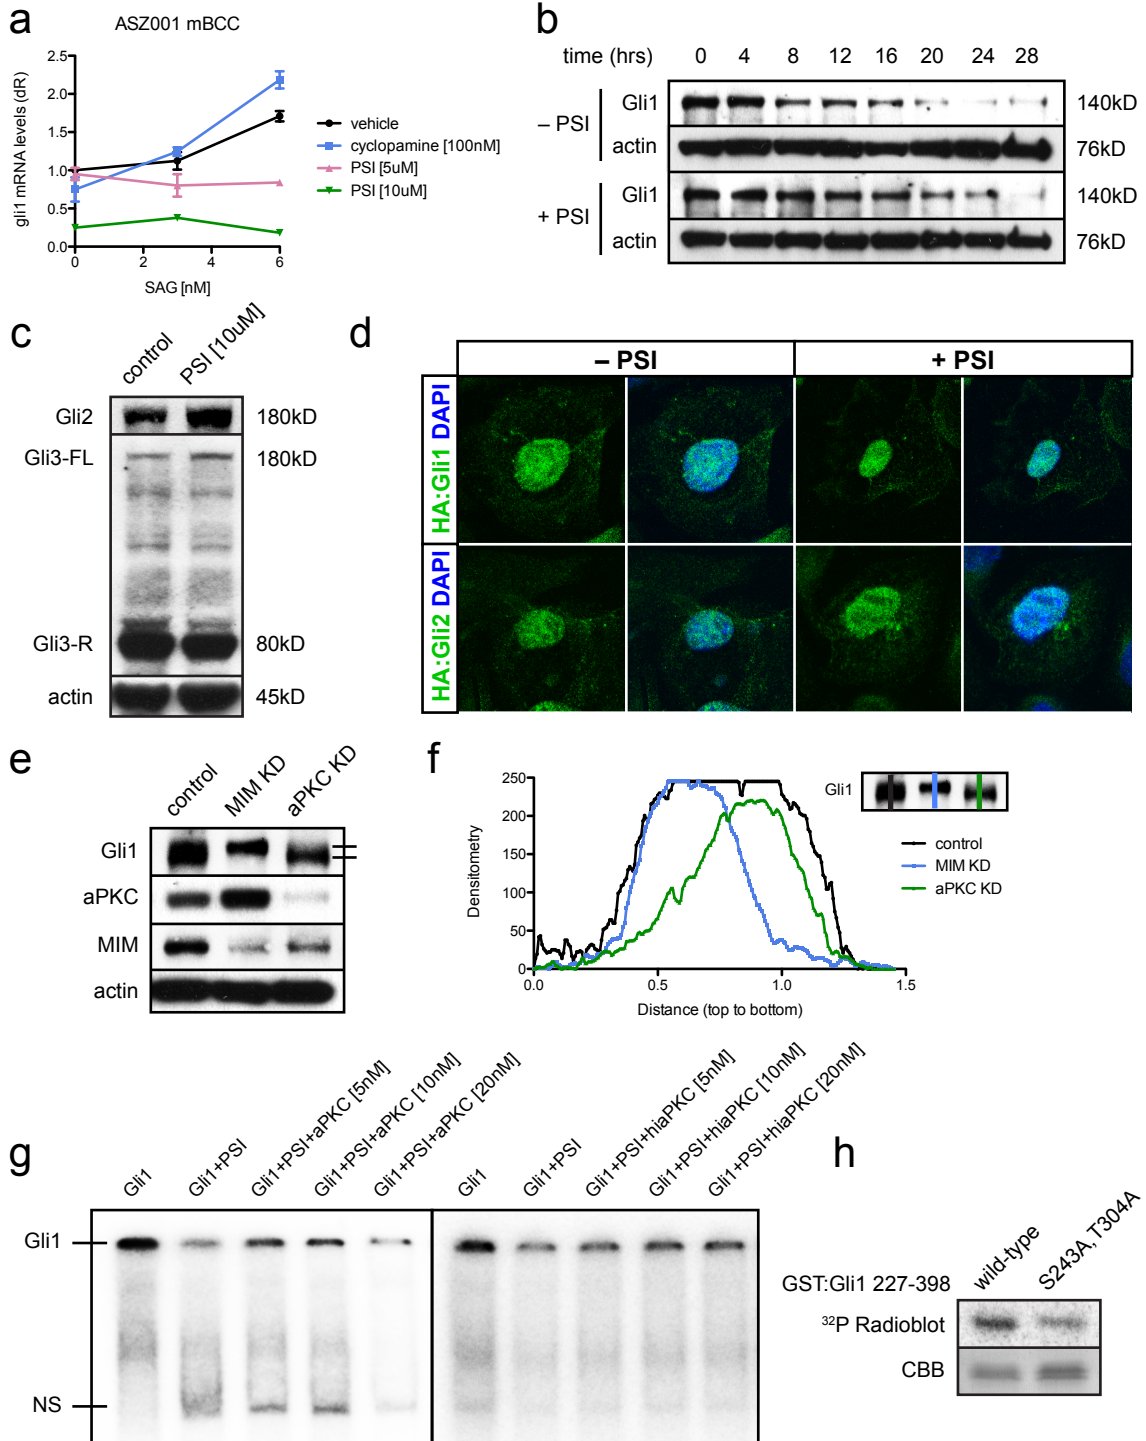

**Supplementary Figure 5: aPKC does not significantly affect Gli protein stability or processing.** **a**, SAG does not rescue reduced Hh signaling from PSI-treated BCC cells (n=3). Error bars, s.e.m. **b**, PSI modestly stabilizes Gli1 protein levels in BCC cells. **c**, Gli processing is not altered with PSI treatment in primary mouse dermal cells where no

loss of cilia is observed. **d**, PSI does not alter transfected nuclear HA:Gli protein localization in BCC cells. **e**, Gli1 protein has altered electrophoretic mobility with knockdown of aPKC or MIM. **f**, Densitometry graph of Gli1 protein. **g**, Over phosphorylation of IVT human Gli1 by aPKC disrupts DNA binding whereas heat-inactivated aPKC does not rescue DNA-binding of PSI-treated Gli1. **h**, GST:Gli1 227-398<sup>S243A,T304A</sup> accumulates less phosphorylation than wild-type protein when exposed to aPKC in an *in vitro* kinase assay.

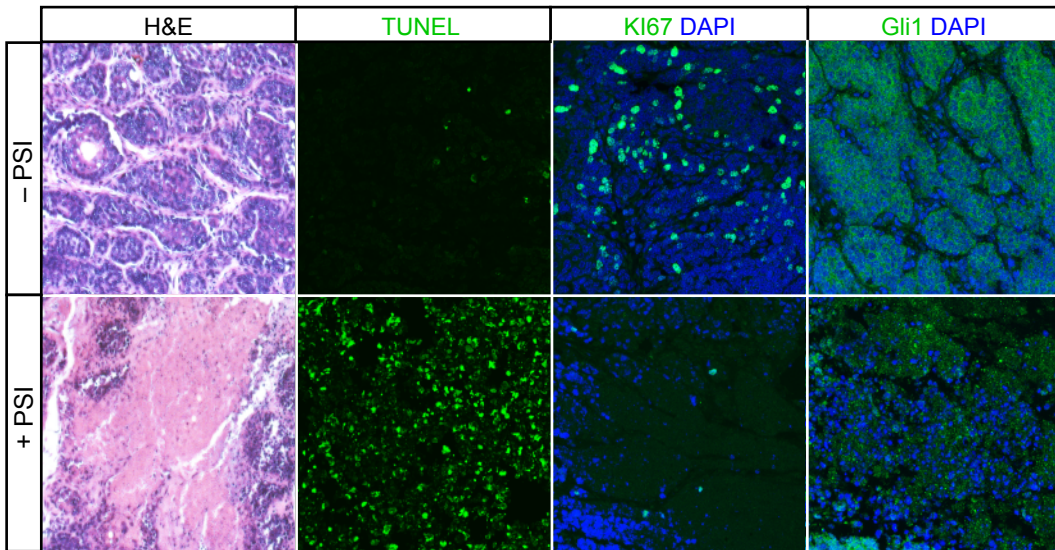

**Supplementary Figure 6: PSI disrupts tumor growth.** BCC tumors lose classical palisades, with an increase in TUNEL-positive cells and a decrease in KI67-positive cells and Gli1 stain.

| Value      | DMSO  | ± SEM | PSI   | ± SEM |
|------------|-------|-------|-------|-------|
| Glucose    | 257.9 | 28.05 | 255   | 38.19 |
| AST        | 277.9 | 73.7  | 233.6 | 134.6 |
| ALT        | 227.8 | 80.55 | 148.4 | 99.95 |
| AlkPhos    | 270   | 42.17 | 247.8 | 17.46 |
| GGT        | 0     | 0     | 0.714 | 0.63  |
| Bilirubin  | 0     | 0     | 0.015 | 0.012 |
| Chol       | 108.3 | 7.473 | 105.2 | 8.271 |
| BUN        | 20.38 | 1.281 | 22.22 | 1.597 |
| Creat      | 0.463 | 0.042 | 0.489 | 0.031 |
| Ca         | 11.16 | 0.295 | 11.41 | 0.316 |
| Phos       | 11.88 | 0.63  | 12.01 | 0.641 |
| T.P.       | 5.5   | 0.138 | 5.689 | 0.247 |
| Albumin    | 3.175 | 0.098 | 3.256 | 0.108 |
| Globulin   | 2.325 | 0.088 | 2.433 | 0.17  |
| Na         | 152.4 | 0.754 | 151   | 0.926 |
| K          | 8.05  | 0.573 | 8.2   | 0.851 |
| Cl         | 109.8 | 0.701 | 110.1 | 0.811 |
| Co2        | 24.3  | 1.521 | 26.8  | 1.536 |
| WBC        | 6.991 | 0.833 | 9.422 | 0.858 |
| RBC        | 8.745 | 0.266 | 8.916 | 0.243 |
| HGB        | 13.92 | 0.239 | 14.41 | 0.337 |
| HCT        | 44.3  | 0.828 | 46.18 | 1.228 |
| MCV        | 50.78 | 0.727 | 51.81 | 0.665 |
| MCH        | 15.98 | 0.23  | 16.2  | 0.247 |
| MCHC       | 31.45 | 0.192 | 31.26 | 0.297 |
| Platelet   | Adeq  | Adeq  | Adeq  | Adeq  |
| Neutrophil | 14.75 | 4.858 | 17.22 | 3.09  |
| Lymphocyte | 77.25 | 5.195 | 72.89 | 2.988 |
| Monocyte   | 6.125 | 1.156 | 9     | 1.067 |

**Supplementary Figure 7: Topical PSI does not alter chemical or hematological parameters.** Topical treatment of mice with DMSO (n=8) or 0.8mg/kg PSI dissolved in DMSO (n=9) results in no significant differences in blood parameters. Error bars, s.e.m.

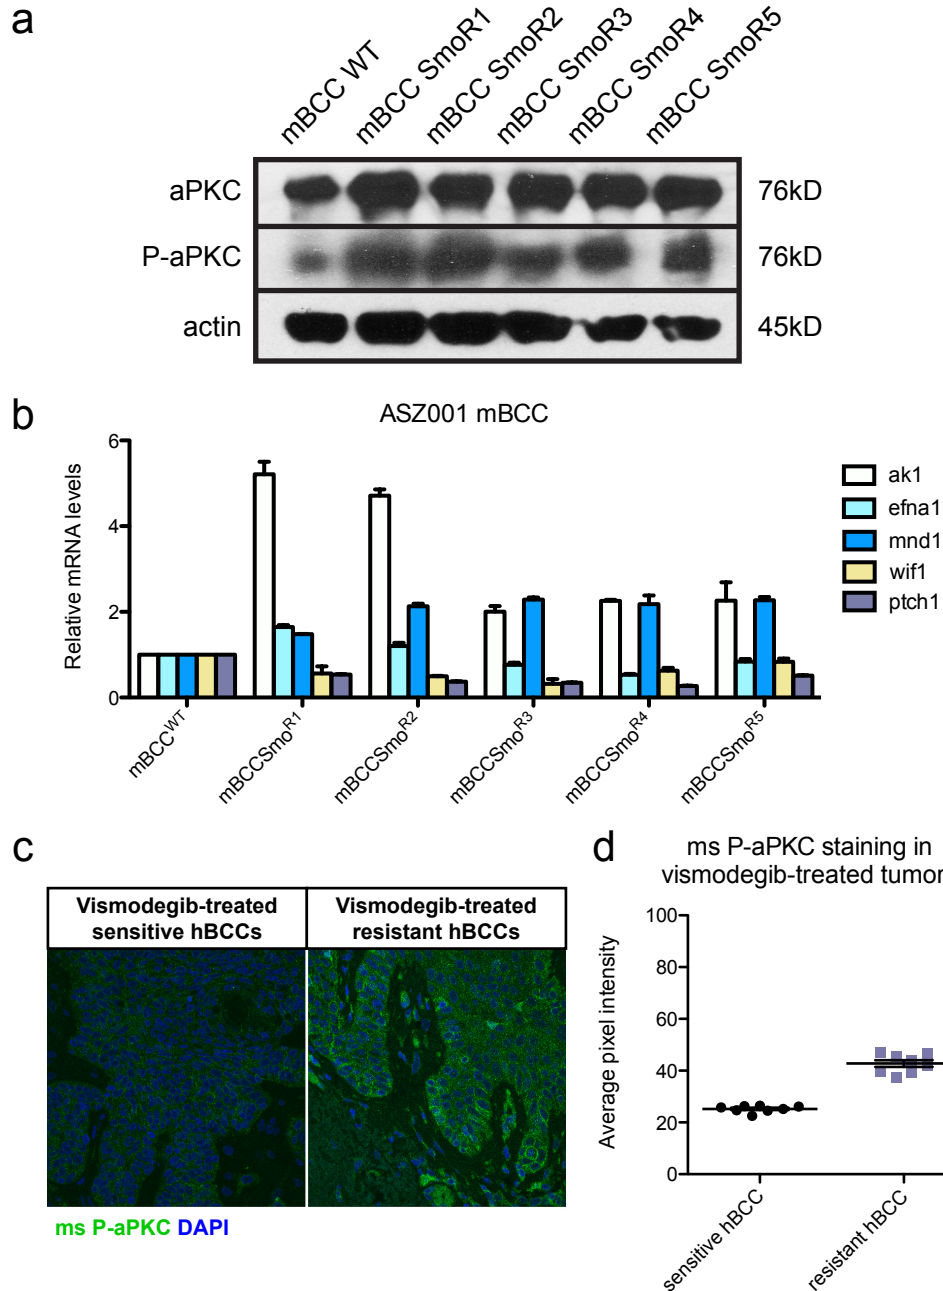

**Supplementary Figure 8: Vismodegib-resistant BCCs are positive for P-aPKC.** **a**, Total and activated aPKC protein levels are enriched in Smo antagonist-resistant cell lines. **b**, Gli target gene transcript levels are differentially regulated in Smo-resistant BCC cells and follow *gli1* mRNA levels, *apkc* levels, or are generally suppressed (n=3). **c**, Activated P-aPKC is enriched in vismodegib-treated resistant human BCCs (n=2) compared to vismodegib-sensitive tumors (n=2) using a mouse monoclonal antibody. **d**, Average pixel intensity of mouse monoclonal P-aPKC antibody stains in vismodegib-treated human tumors. Error bars, s.e.m.

| ChIP          | forward oligo             | reverse oligo                | source            |
|---------------|---------------------------|------------------------------|-------------------|
| nanog         | GGAAGAACCACTCTACCAATACTCA | GTGTTTAAATTAATGTAGAGGCCTTCTG | Po et al, 2010    |
| ptch1-1       | ACAAAAGGAACGGAAAGTGT      | AGCACGTTCCCTCCAGTTTAC        | Vokes et al, 2007 |
| ptch1-2       | CCAGGCTCTCTAACAAGC        | ACAACATTATCGCTGGGAAT         | Vokes et al, 2007 |
| rab34         | CAAAAAGCTCCATTCTCACAA     | AGGAAACTGGGAGAACATCA         | Vokes et al, 2007 |
| nkx2-9        | CTACCAAGCGTGCCTAAAGT      | TTTATCCCAGGGAGCTAAAG         | Vokes et al, 2007 |
| hhip1         | TAAAAGGGCACACTTGAAAA      | AATTGCTGCAGACCCTAAAT         | Vokes et al, 2007 |
| actin         | AGAAGGACTCCTATGTGGGTGA    | ACTGACCTGGGTCATCTTTTC        | Vokes et al, 2007 |
| gapdh         | ACAACCTTGGCATTGAGGAA      | GATGCAGGGATGATGTTCTG         | IDT oligos        |
| prkci-p1      | TTGGTCTGAGAGGCTGAAG       | GTTGGACAGCGATCATTGC          |                   |
| prkci-p2      | GGCTGCGAAGATGGCTCTCC      | GTACCACTTCCTTGAATTGG         |                   |
|               |                           |                              |                   |
| <b>qRTPCR</b> |                           |                              |                   |
| prkci         | AAGGAACGATTGGGTTGTCACCCCT | AAGGGTGGAAACCACCTGCTTTTGCT   | IDT oligos        |
| prkcz         | ACATCATCACGGACAACCCTGACA  | TGTGAGGCCTTGACAGACAGGAAA     | IDT oligos        |
| cdc42         | GCAGGGCAAGAGGATTATGAC     | TCTCAGGCACCCACTTTTC          | IDT oligos        |
| sulf1         | TGCTGAACAGTCACCCTGATCCAA  | ACCACATGACTTGGGTCTTCACCT     | IDT oligos        |
| mnd1          | ATGACGGTATGGTTGACTGCGAGA  | CCGGCCAACCTTGCTTTCTCAAT      | IDT oligos        |
| efna1         | GTTTAACCAGCCCAACTGTGCCAT  | AGGTCCGCACAGCTTGTTTCTTTG     | IDT oligos        |
| acot7         | TGTGTATTTACGGCAGGAGCAGGA  | AATGTCTCCGTTCTCCACTTGGT      | IDT oligos        |
| pard6a        | CTGGGCTTCTACATTCGAGA      | TGACAGTGACGATGAGGTTG         | Realtimeprimers   |
| sox9          | CCAGCGTTTAACCTTCAAGA      | TGACCATACCCCTTGAGGAA         | Realtimeprimers   |
| slc2a1        | TGCCAAGCTAATCTGTAGGG      | GAATGGGCGAATCCTAAAAT         | Realtimeprimers   |
| ak1           | GGAGTGTGAGCTGCCATAGA      | GGGAAGTCACTAGGGATGGA         | Realtimeprimers   |
| gng12         | CTAAGCACCGCAAATTTAAA      | GGTGGTTAGTGCCCATAGTG         | Realtimeprimers   |

**Supplementary Table 1.**
